# Supplementary material for: Psychosocial stressors and protective factors for major depression in youth: evidence from a case–control study
Source: Springer Nature journal article supplement (doi:10.1186/s13034-020-0312-1), 2020-02-08
Supplement: MOESM1 [file 17662692]

**Additional file 1***Frequency of current and past comorbid diagnoses in the MD group*

|                               | Frequencies       |                |
|-------------------------------|-------------------|----------------|
|                               | Current diagnosis | Past diagnosis |
| Oppositional defiant disorder | 7.5%              | 5.4%           |
| Conduct disorder              | 2.2%              | 1.1%           |
| Separation anxiety disorder   | 2.2%              | 4.3%           |
| Specific anxiety disorder     | 22.1%             | 7.5%           |
| Social anxiety disorder       | 16.0%             | 1.1%           |
| Generalized anxiety disorder  | 4.3%              | 1.1%           |
| Panic disorder                | 1.1%              | 1.1%           |
| Agoraphobia                   | 4.3%              | 1.1%           |
| Posttraumatic stress disorder | 0%                | 5.3%           |
| Dysthymia                     | 0%                | 9.7%           |
